# Supplementary material for: Toward a Rapid Production of Multivirus-Specific T Cells Targeting BKV, Adenovirus, CMV, and EBV from Umbilical Cord Blood
Source: PubMed Central journal article supplement — Mol Ther Methods Clin Dev. 2017 Mar 8;5:13–21. doi: 10.1016/j.omtm.2017.02.001 (PMC5415312; doi:10.1016/j.omtm.2017.02.001), 2017-03-08
Supplement: mmc1.pdf [file mmc1.pdf]

**OMTM, Volume 5**

**Supplemental Information**

**Toward a Rapid Production of Multivirus-Specific  
T Cells Targeting BKV, Adenovirus, CMV, and EBV  
from Umbilical Cord Blood**

**Hema Dave, Min Luo, J.W. Blaney, Shabnum Patel, Cecilia Barese, Conrad Russell  
Cruz, Elizabeth J. Shpall, Catherine M. Bollard, and Patrick J. Hanley**

## **Supplement Figure Legend**

**Supplemental Figure 1:** Immunophenotype of multi-VSTs. Dot plots of 2 representative multi-VSTs lines showing CD3, CD19 (B cells) CD16-56 (NK cells), CD14 (monocytes) and CD4/8 populations (Fig. S1-A) as well as memory phenotype (Fig.S1-B).

**Supplemental Figure 2:** Intracellular cytokine staining of rapidly produced multi-VSTs. Intracellular cytokine staining of multivirus-VST following restimulation with viral pepmixes showed polyfunctionality, with different cytokines (INF $\gamma$ , TNF $\alpha$  and IL2) produced by VST from 1 representative CB line.

S1-A.

CB1

CB2

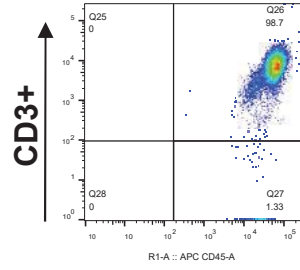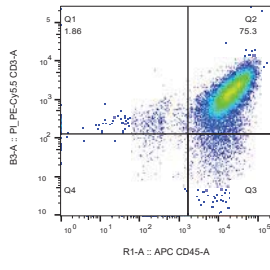

CD45+

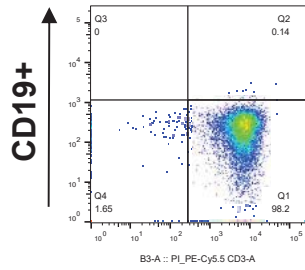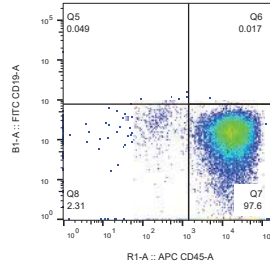

CD45+

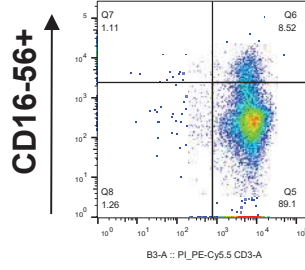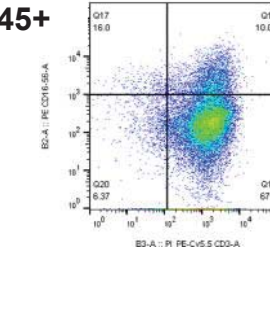

CD3+

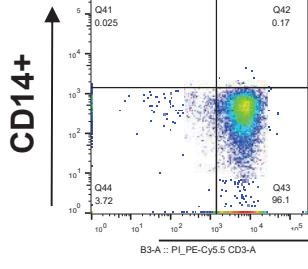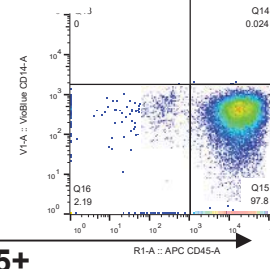

CD45+

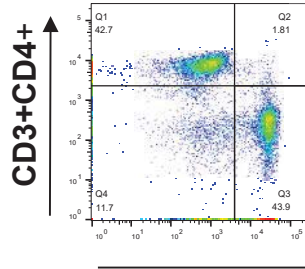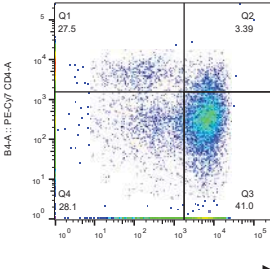

CD3+CD8+

CD3+CD8+

S1-B.

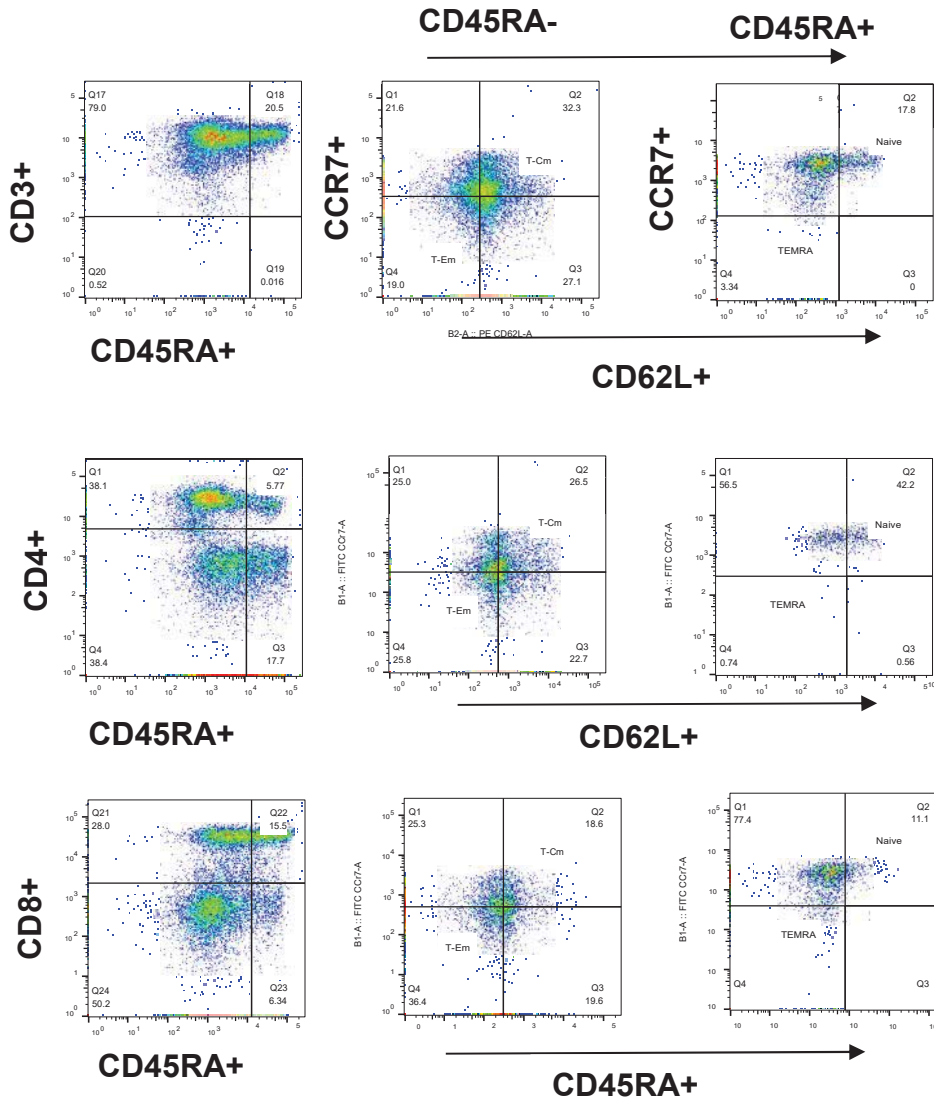

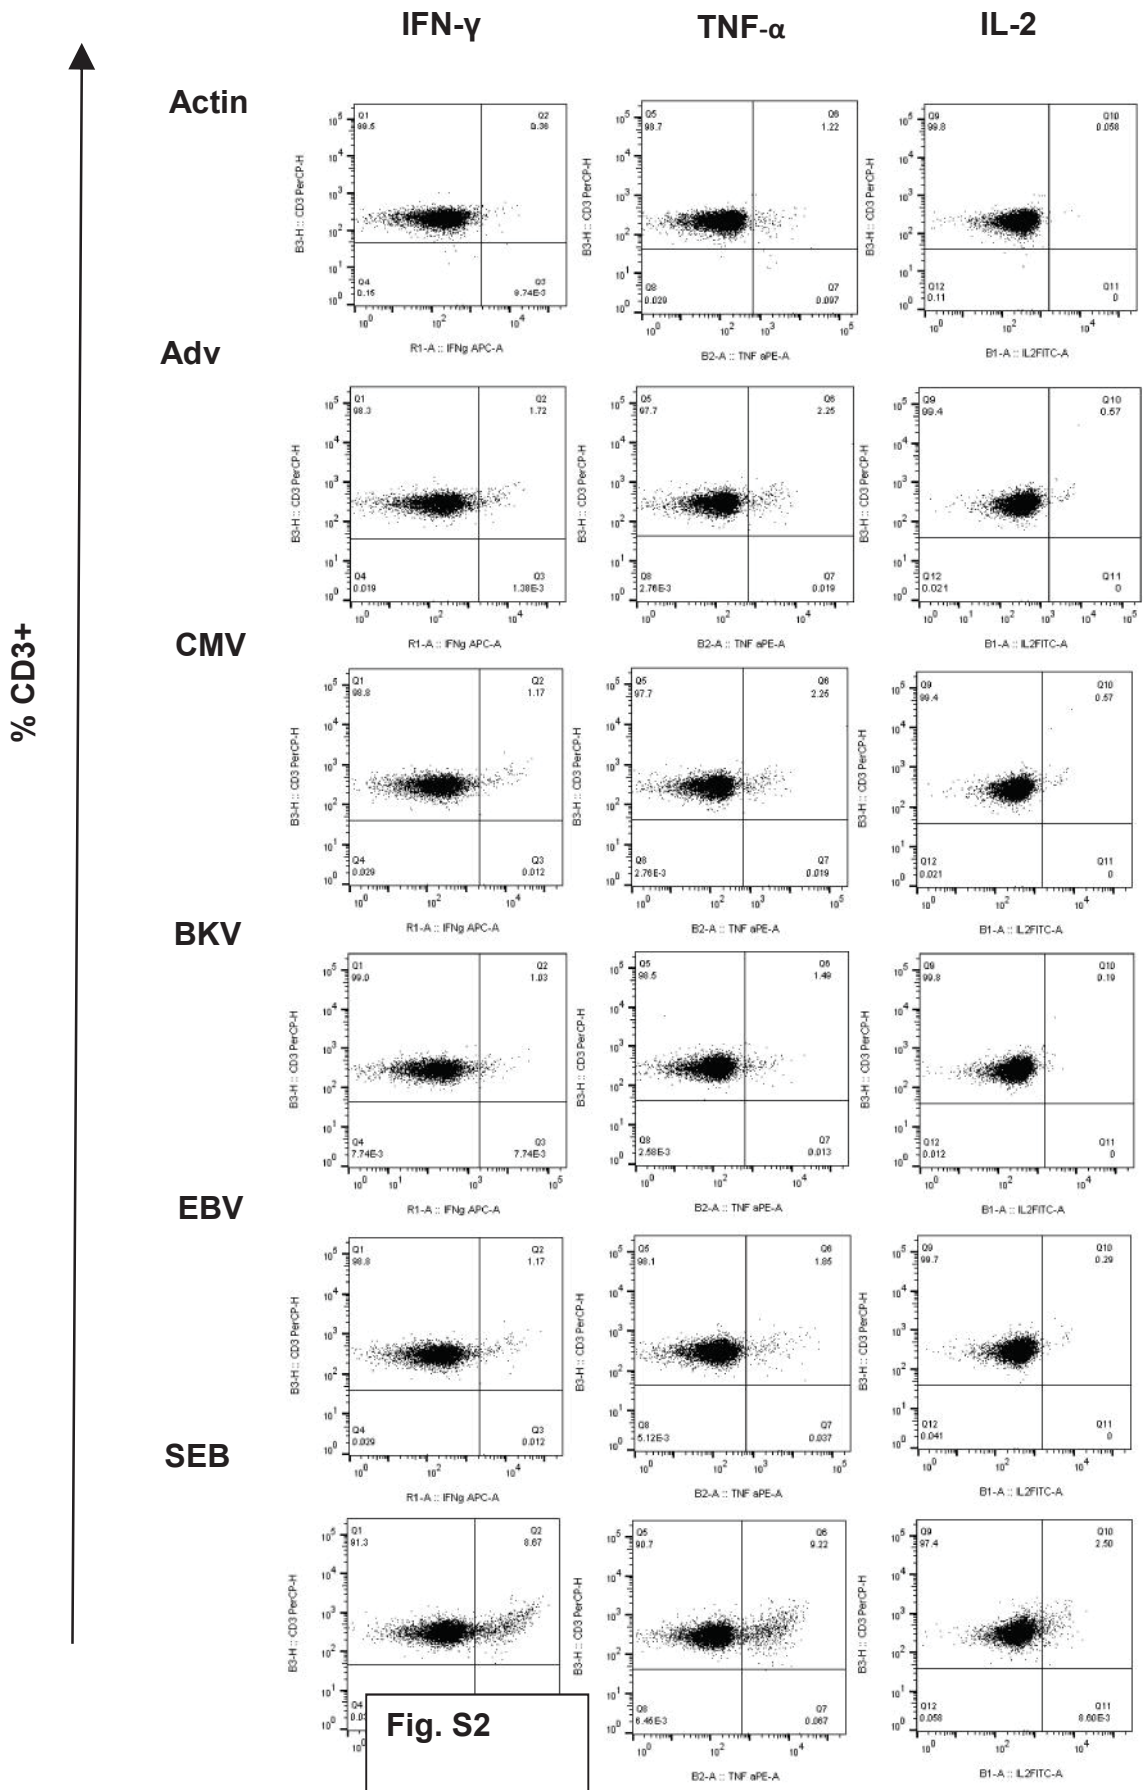

**Fig. S2**

**Fig.S2**
